# Supplementary material
Source: PubMed Central journal article supplement (PMC4558343)
Supplement: NIHMS710217-supplement-1.pdf [file NIHMS710217-supplement-1.pdf]

1 **Supplemental Table 1. Publications utilizing  $\alpha$ MyHC-Cre mice and controls**  
2 **included.** Results of literature search for primary research papers citing [1] in  
3 which  $\alpha$ MyHC-Cre mice were used to conditionally delete or overexpress a  
4 floxed gene in cardiac myocytes. Control group genotypes, if specified, are  
5 noted. Approximately 20% of papers cite  $\alpha$ MyHC-Cre mice as controls while  
6 nearly 50% cite floxed littermates as controls. WT: Wild type, fl/fl: Gene of  
7 interest with flanking *loxP* sites.

8  
9 **Supplemental Table 2. Primer sequences.**

10  
11 **Supplemental Table 3. Morphometric and functional M-mode**  
12 **echocardiography.** Summary of echocardiography measurements made in 3  
13 and 6 month old male and female mice. N/group is displayed in column heading  
14 \* $P < 0.05$ , \*\* $P < 0.01$  vs. WT, age-matched control.

15  
16 **Supplemental Figure 1.  $\alpha$ MyHC-Cre ventricular mRNA and Protein**  
17 **expression.** Cre mRNA expression by qRT-PCR (A) and Cre protein expression  
18 by immunoblot (B). Error bars: SEM, N=4-6/group \*\*\* $P < 0.001$  vs. WT control.

19  
20 **Supplemental Figure 2. Cre expression correlates with cardiac function at 3**  
21 **months. (A).** %EF in 3 month-old mice. (B) Cre expression by qRT-PCR. Cre  
22 expression is grouped into “high” (solid line) and “low” (dashed line). (C) %EF  
23 separated into Cre “high” and Cre “low” demonstrates dose-dependence of Cre  
24 effect on %EF. N=4-6/group \* $P < 0.05$ .

25  
26 **Supplemental Figure 3. Myocardial analysis of inflammatory cells.**  
27 Histochemical assessment of activated macrophages (F4/80<sup>+</sup> cells) in ventricular  
28 myocardium. Arrows indicate F4/80<sup>+</sup> cells. Scale bar: 100 $\mu$ m.

29  
30 **Supplemental Figure 4. Ventricular gene expression changes in 6 month-**  
31 **old  $\alpha$ MyHC-Cre<sup>+/-</sup> males.** Many of the gene expression changes observed in  
32  $\alpha$ MyHC-Cre<sup>+/-</sup> females were confirmed in  $\alpha$ MyHC-Cre<sup>+/-</sup> males. Error bars: SEM,  
33 N=4-5/group, \* $P < 0.05$ , \*\* $P < 0.01$  vs. age-matched and sex-matched WT  
34 controls.

35  
36 **Supplemental Figure 5. Gene expression is disrupted in a subset of genes**  
37 **harboring degenerate *loxP* sites. (A)** qRT-PCR mRNA expression in 6 month  
38 old  $\alpha$ MyHC-Cre<sup>+/-</sup> females of a subset of genes harboring degenerate *loxP* sites.  
39 27/55 (49%) genes identified were tested. Expression changes were observed  
40 for 7/27 (26%) of genes tested. (B) Protein expression (immunoblot) for ME3  
41 normalized to Gapdh. N=3-4/group \* $P < 0.05$  &  $P < 0.1$  vs. WT control.

42  
43 **Supplemental Figure 6. Genomic insertion site of  $\alpha$ MyHC-Cre transgene**  
44 **does not likely account for cardiotoxicity. (A)** PCR-based strategy for  
45 mapping transgene insertion site utilizes sequential, forward gene-specific  
46 primers (GSP1-3) in 3' end of  $\alpha$ MyHC-Cre transgene and degenerate, reverse

1 primers in flanking genomic DNA. **(B)** Screenshot of UCSC Genome Browser  
2 window displaying Chromosome 6 genomic locus of transgene to which PCR  
3 products were mapped. The region is intergenic and non-transcriptionally active  
4 based on displayed Genome Browser tracks. **(C)** Genomic locus was verified  
5 using PCR of additional animals. Products of expected length based on primer  
6 design were only amplified in  $\alpha MyHC-Cre^{+/-}$  mice. Lane 1: 1kb+ DNA ladder  
7 (Invitrogen), Lane 2: LML (low mass ladder, Invitrogen), Lane 3: *Cre* PCR  
8 product, positive control, Lanes 4-17:  $\alpha MyHC-Cre$  genotype (+ or -) or no  
9 template control (NTC).

10  
11 **Supplemental Figure 7.  $\alpha MyHC-Cre$  transgene copy number in  $\alpha MyHC-$**   
12  **$Cre^{+/-}$  mice.** Copy number was estimated based on standard curves generated  
13 with known copy numbers of either *Cre* **(A)** or a control gene, *Myh15* (2  
14 copies/genome) **(B)**. **(C)** An average of 6 copies of the  $\alpha MyHC-Cre$  transgene  
15 were detected per genome, when normalized to *Myh15* copy number, N=8.  
16

17 **Supplemental Figure 8. Lower levels of myocardial *Cre* expression do not**  
18 **result in cardiotoxicity.** *Cre* expression and cardiotoxicity were assessed in  
19 male WT, “conventional”  $\alpha MyHC-Cre^{+/-}$  mice [1] and “alternate”  $\alpha MyHC-Cre^{+/-}$   
20 mice [2]. Although both transgenes drive *Cre* expression under the  $\alpha MyHC$   
21 promoter, the transgene structures differ in their 3'UTRs and promoter  
22 sequences [1,2]. Differences in transgene structure, copy number and insertion  
23 site may all contribute to expression differences in *Cre*. **(A)** *Cre* protein  
24 expression (immunoblot). **(B)** Cardiac function (%EF). **(C)** Gene expression  
25 (qRT-PCR). Error bars: SEM, N=4-5/group, \* $P < 0.05$ , \*\* $P < 0.01$ , \*\*\* $P < 0.001$ ,  
26 \*\*\*\* $P < 0.0001$  vs. age-matched and sex-matched WT controls.  
27

## 28 References

- 29 [1] Agah R, Frenkel PA, French BA, Michael LH, Overbeek PA, Schneider MD.  
30 Gene recombination in postmitotic cells. Targeted expression of *Cre*  
31 recombinase provokes cardiac-restricted, site-specific rearrangement in  
32 adult ventricular muscle in vivo. 1997;100:169–79.  
33 [2] Abel ED, Kaulbach HC, Tian R, Hopkins JCA, Duffy J, Doetschman T, et al.  
34 Cardiac hypertrophy with preserved contractile function after selective  
35 deletion of GLUT4 from the heart 1999;104:1703–14.  
36

**S Table 3.****3 months**

| (N)              | WT Female (6)    | Cre <sup>+/-</sup> Female (14) | WT Male (6)     | Cre <sup>+/-</sup> Male (10) |
|------------------|------------------|--------------------------------|-----------------|------------------------------|
| %EF              | 59.57 ± 2.13     | 62.92 ± 1.41                   | 54.55 ± 1.90    | <b>**64.24 ± 1.72</b>        |
| LVID;s (cm)      | 0.270 ± 0.0057   | 0.258 ± 0.00283                | 0.294 ± 0.00835 | <b>*0.259 ± 0.00618</b>      |
| LVID;d (cm)      | 0.388 ± 0.00471  | 0.384 ± 0.00355                | 0.408 ± 0.00991 | 0.408 ± 0.00844              |
| LVAW;s (cm)      | 0.12 ± 0.0032    | 0.12 ± 0.0023                  | 0.12 ± 0.0043   | 0.13 ± 0.0033                |
| LVAW;d (cm)      | 0.062 ± 0.0018   | 0.058 ± 0.0010                 | 0.066 ± 0.0015  | 0.066 ± 0.0012               |
| LVPW;s (cm)      | 0.0983 ± 0.00320 | 0.102 ± 0.00156                | 0.102 ± 0.00198 | <b>*0.109 ± 0.0014</b>       |
| LVPW;d (cm)      | 0.062 ± 0.0014   | 0.061 ± 0.00074                | 0.067 ± 0.0010  | 0.067 ± 0.00090              |
| Heart Rate (bpm) | 434 ± 10.3       | 443 ± 12.7                     | 439 ± 13.8      | <b>**503 ± 9.3</b>           |
| LV Vol;s         | 26.36 ± 1.40     | 23.56 ± 0.77                   | 33.65 ± 2.26    | 26.78 ± 2.46                 |
| LV Vol;d         | 65.32 ± 1.87     | 63.92 ± 1.42                   | 74.09 ± 4.29    | 74.08 ± 3.73                 |
| LV mass          | 64.22 ± 1.21     | <b>*58.57 ± 1.45</b>           | 77.26 ± 4.44    | 76.39 ± 2.09                 |

**6 months**

| (N)              | WT Female (4)   | Cre <sup>+/-</sup> Female (6) | WT Male (4)    | Cre <sup>+/-</sup> Male (8) |
|------------------|-----------------|-------------------------------|----------------|-----------------------------|
| %EF              | 68.41 ± 2.70    | <b>**57.80 ± 1.67</b>         | 65.07 ± 1.60   | <b>*57.24 ± 1.72</b>        |
| LVID;s (cm)      | 0.232 ± 0.0117  | <b>**0.275 ± 0.00693</b>      | 0.256 ± 0.0100 | 0.276 ± 0.0118              |
| LVID;d (cm)      | 0.360 ± 0.00466 | <b>**0.397 ± 0.0029</b>       | 0.395 ± 0.0123 | 0.397 ± 0.0110              |
| LVAW;s (cm)      | 0.12 ± 0.0033   | 0.12 ± 0.0028                 | 0.13 ± 0.0026  | 0.12 ± 0.0022               |
| LVAW;d (cm)      | 0.059 ± 0.0     | <b>***0.067 ± 0.0010</b>      | 0.068 ± 0.0    | 0.068 ± 0.00037             |
| LVPW;s (cm)      | 0.106 ± 0.0052  | 0.104 ± 0.0038                | 0.109 ± 0.0016 | 0.107 ± 0.0032              |
| LVPW;d (cm)      | 0.059 ± 0.0     | <b>*0.067 ± 0.0016</b>        | 0.068 ± 0.0016 | 0.067 ± 0.00037             |
| Heart Rate (bpm) | 531 ± 8.8       | 506 ± 9.6                     | 466 ± 30.7     | 492 ± 18.9                  |
| LV Vol;s         | 18.82 ± 2.41    | <b>**28.54 ± 1.67</b>         | 23.97 ± 2.31   | 29.27 ± 2.88                |
| LV Vol;d         | 59.45 ± 4.98    | 67.39 ± 1.76                  | 68.41 ± 4.88   | 69.56 ± 4.49                |
| LV mass          | 57.36 ± 3.00    | <b>**72.40 ± 2.53</b>         | 74.78 ± 2.91   | 75.29 ± 3.48                |

S1.

A.

qRT-PCR Cre Expression:  
6 month old females

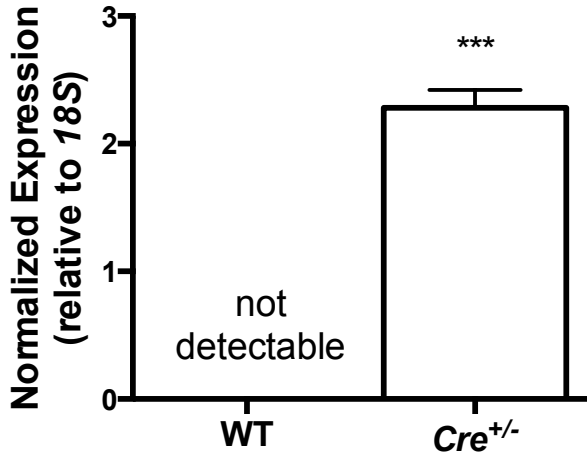

B.

Western Blot: anti-Cre

WT WT WT WT Cre Cre Cre Cre

37 kDa-

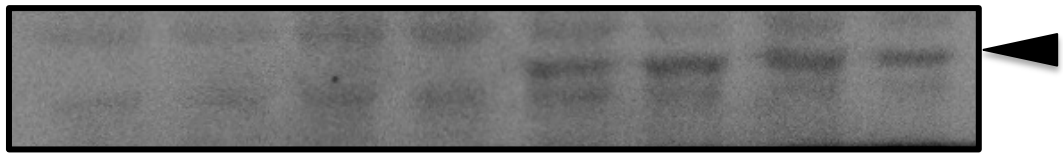

# S2.

## A.

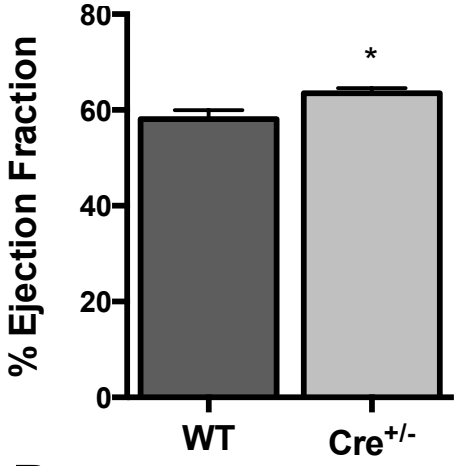

## B.

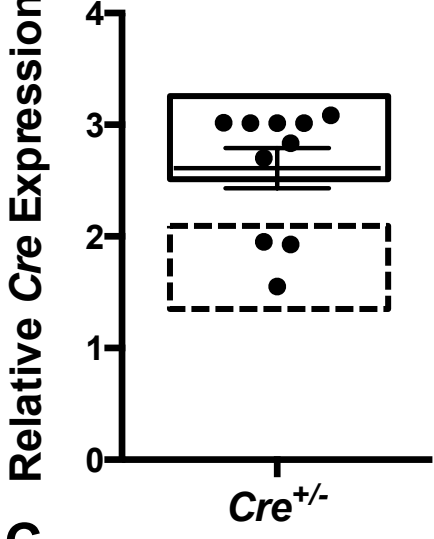

## C.

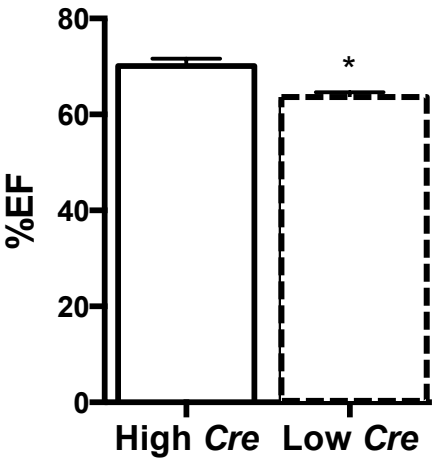



S4. A.

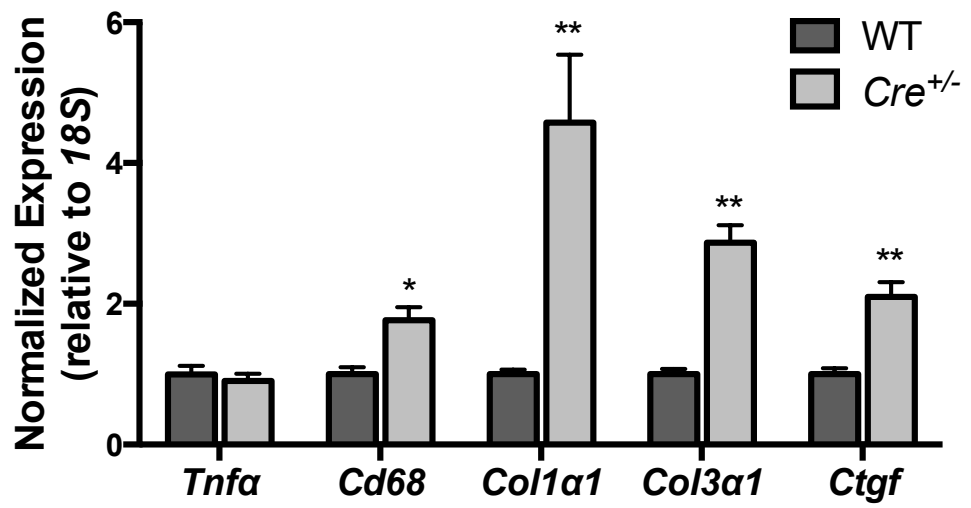

B.

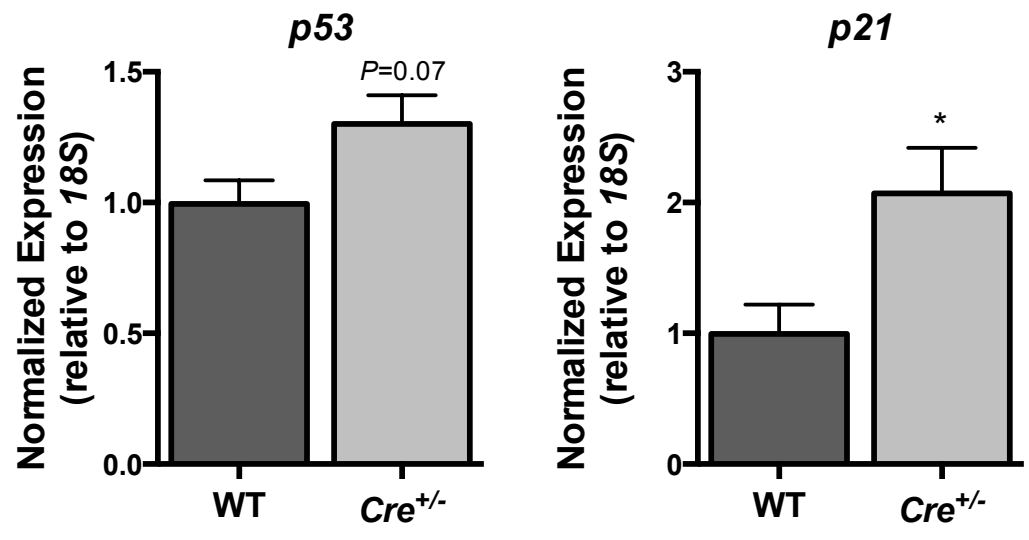

**S5.****A.**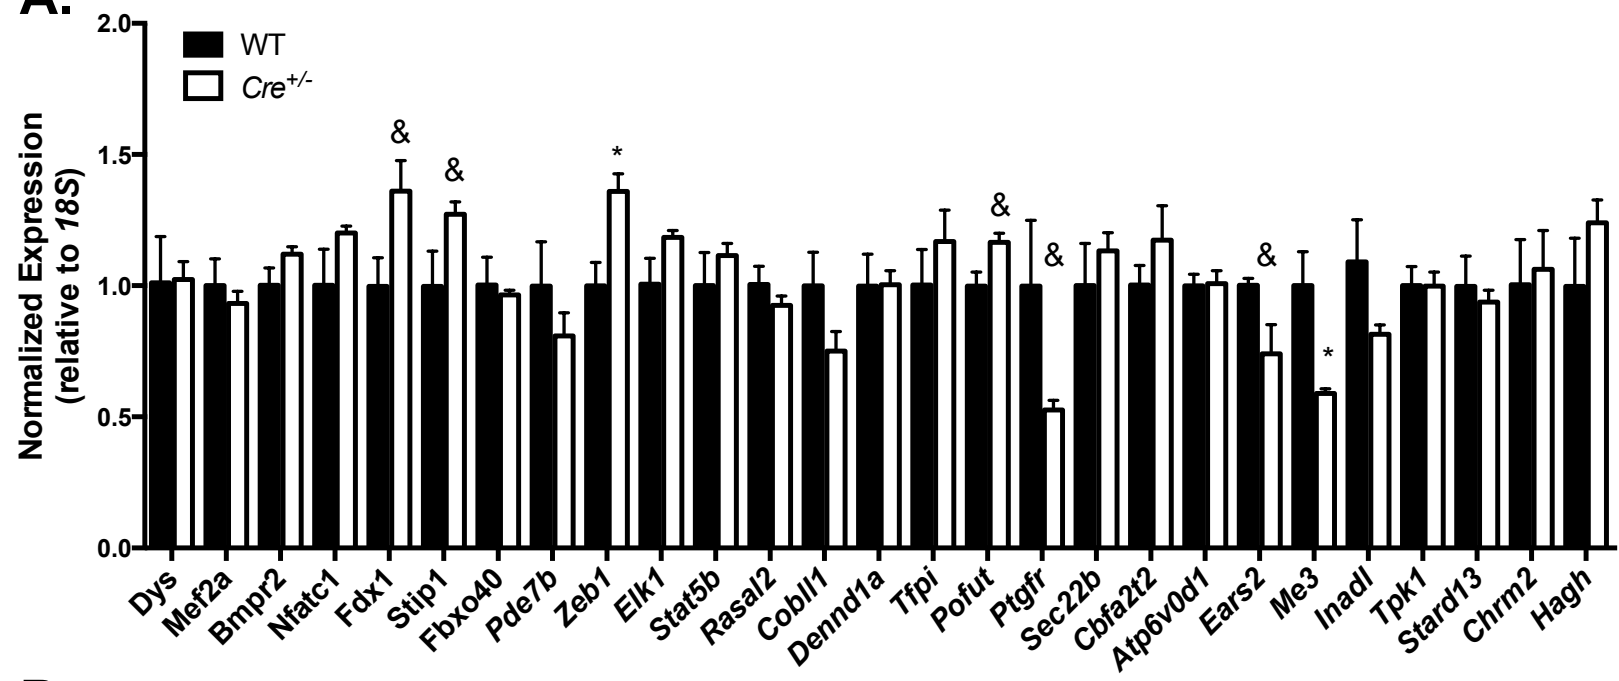**B.**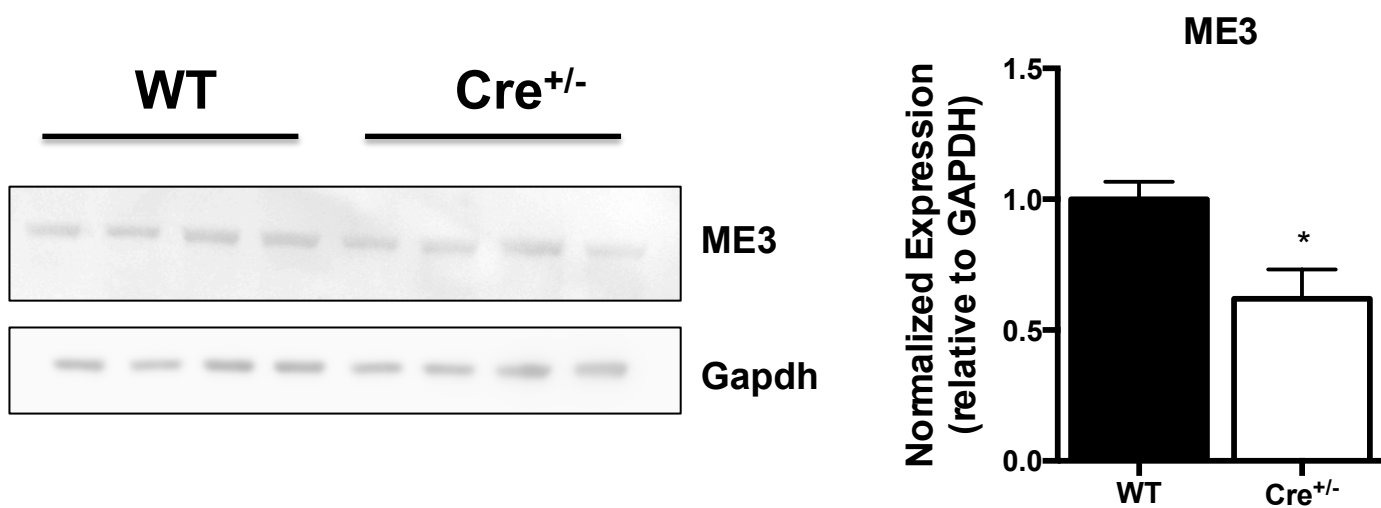



# S6. A. TAIL-PCR Strategy

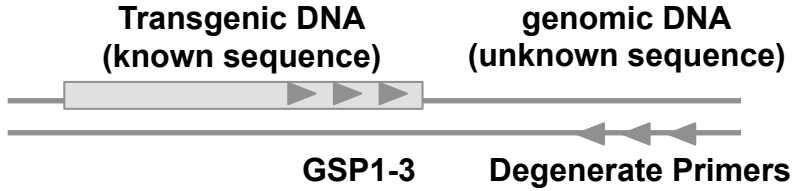

# B. Genomic locus of transgene

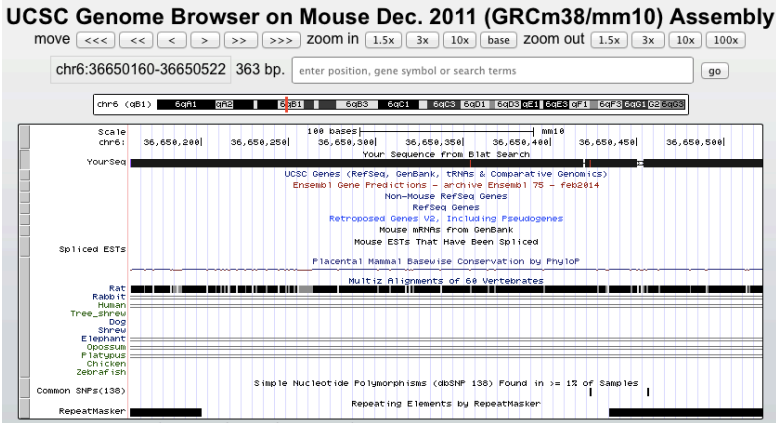

# C. PCR verification of locus

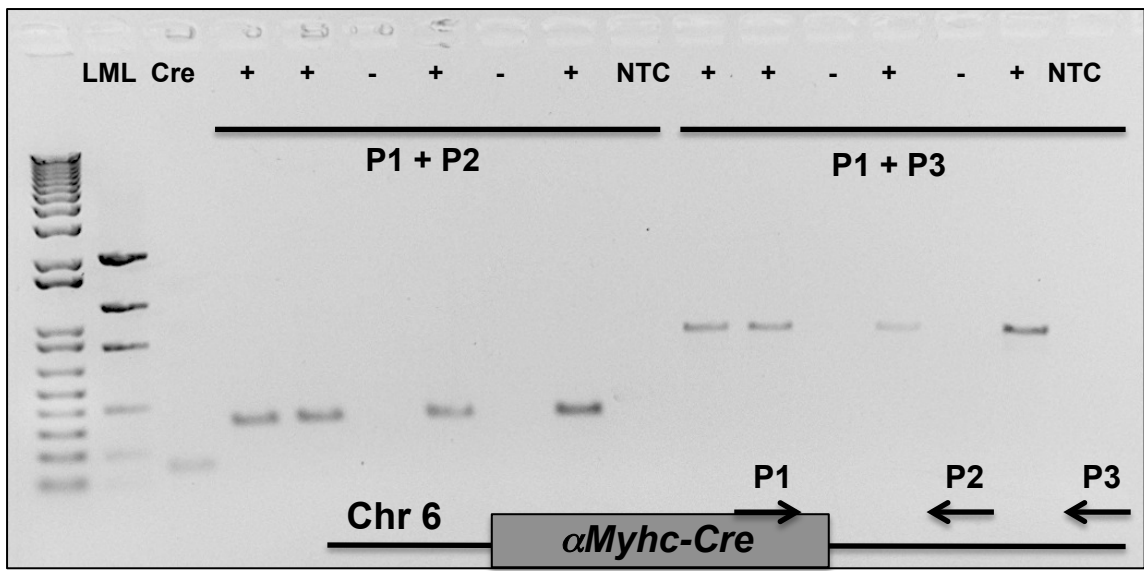

# S7.

## A. Cre standard

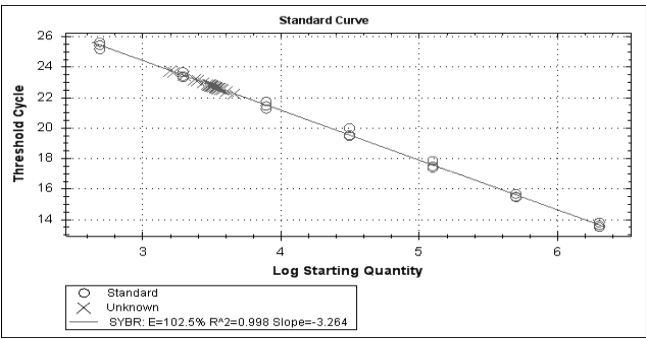

## Myh15 standard

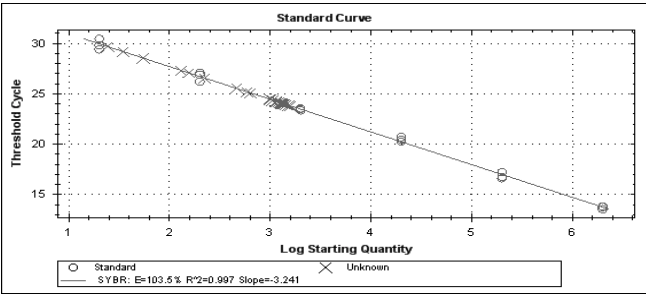

## B.

## C.

Cre Copies/Genome  
Relative to Myh15

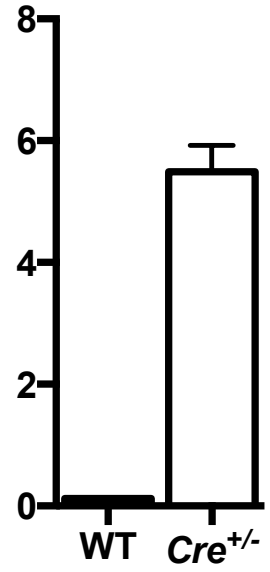

**S8.**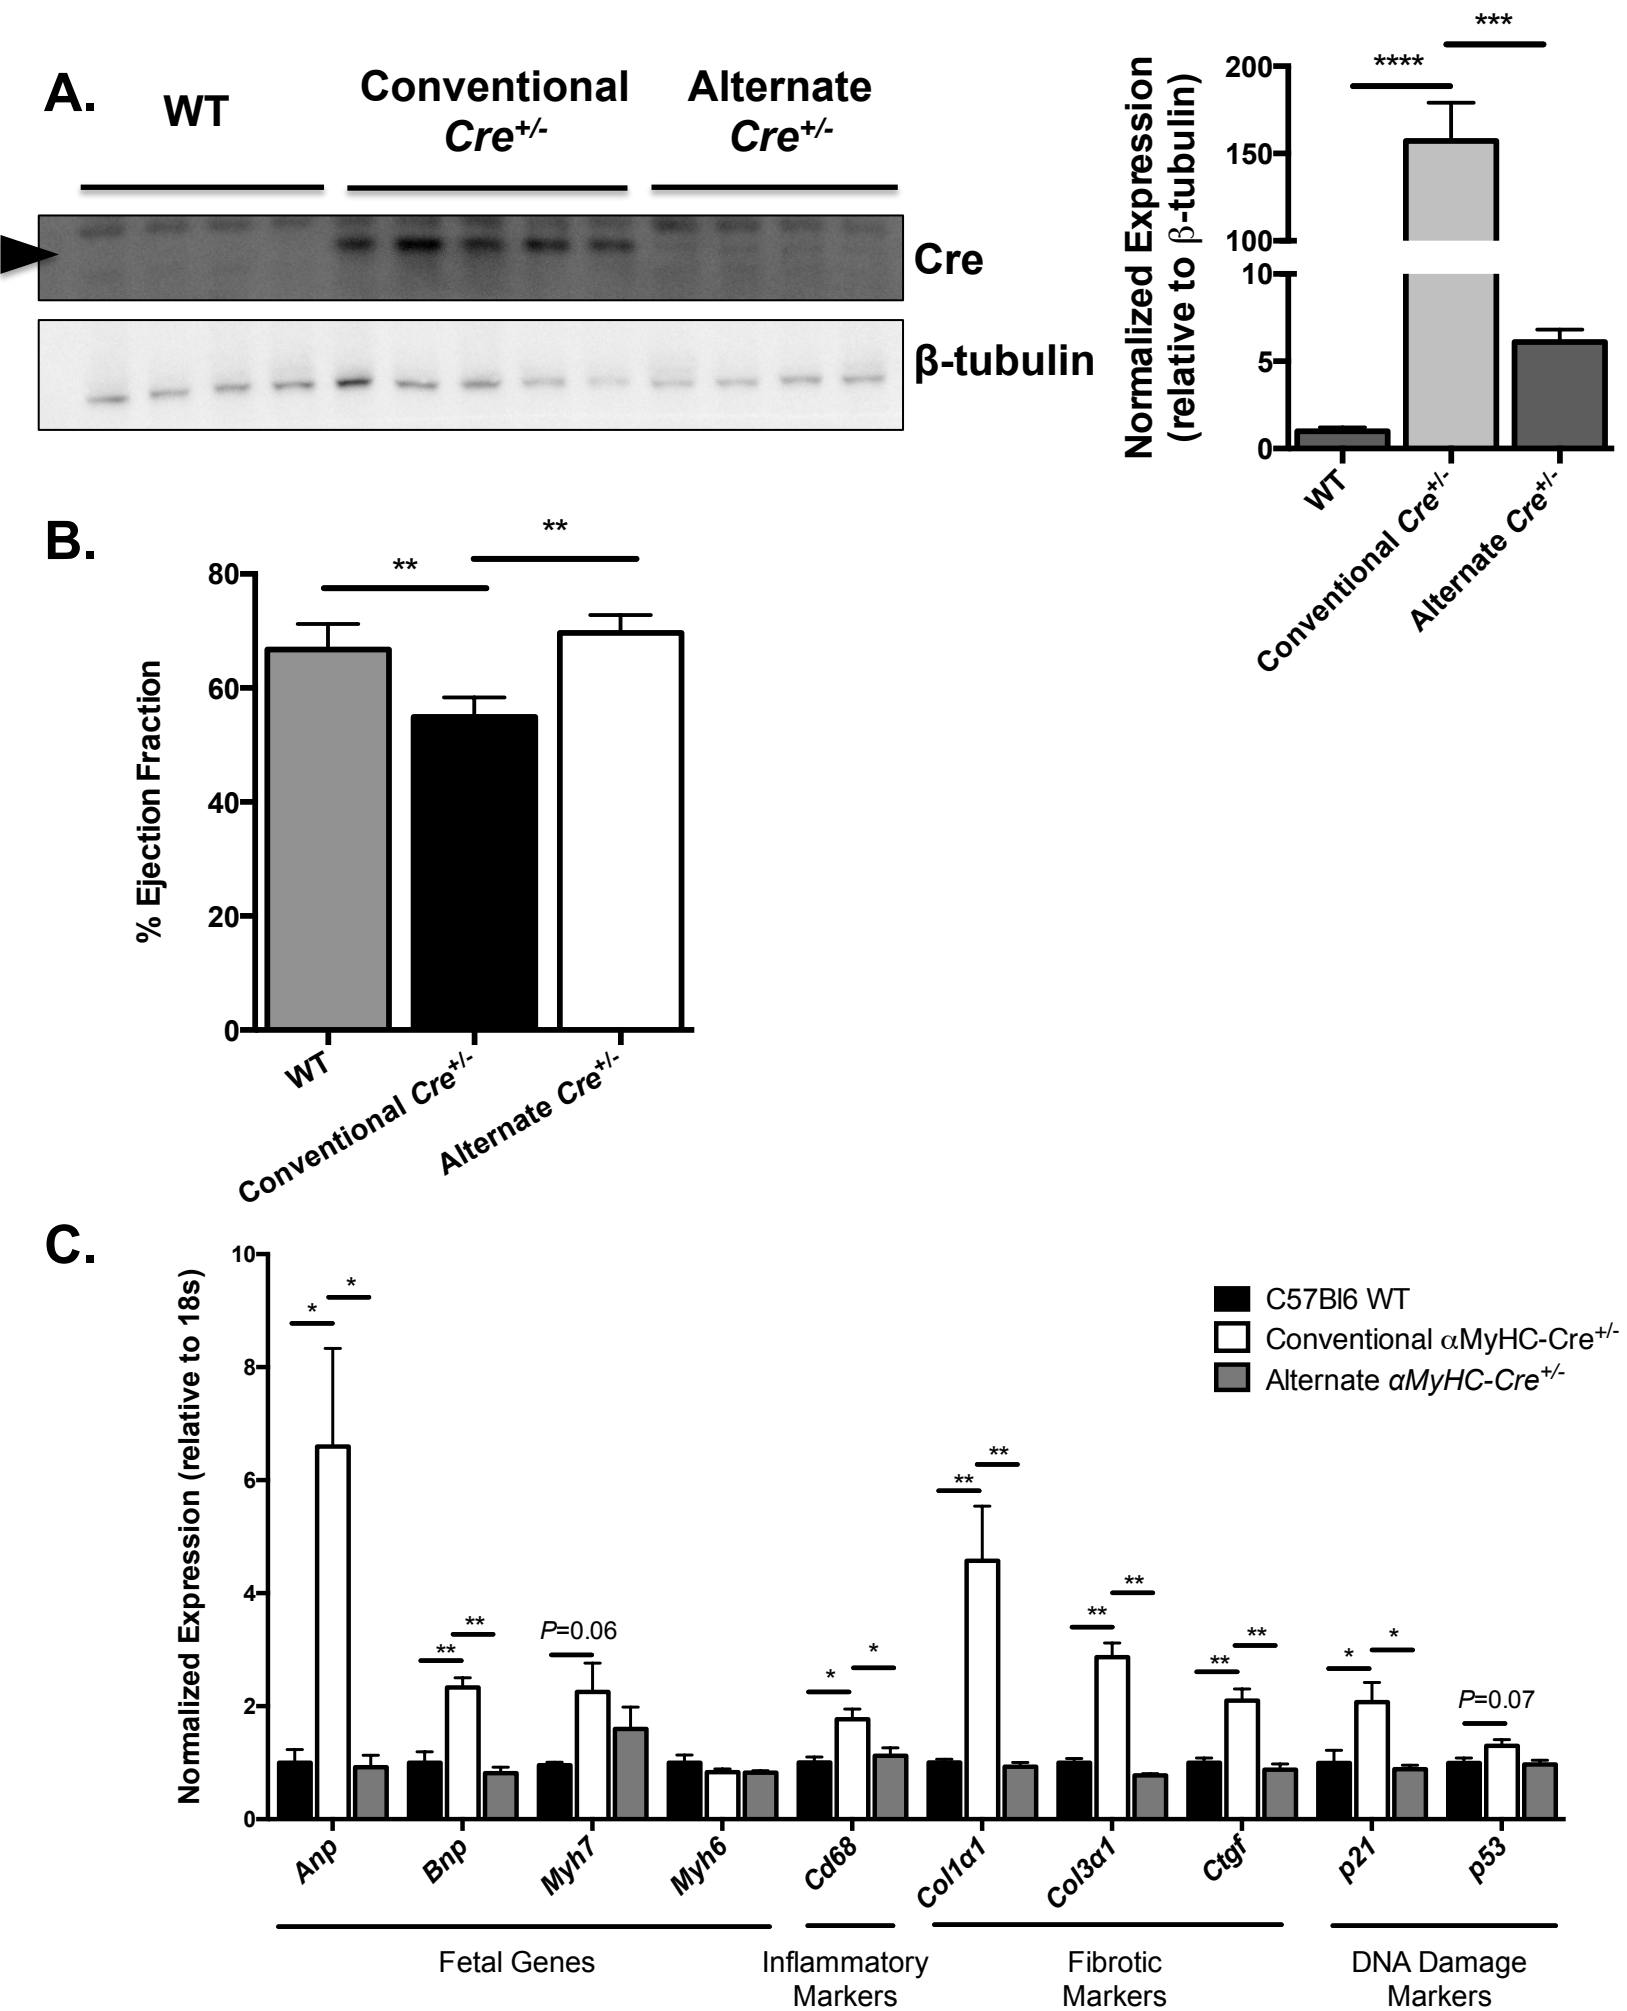

## **Column Numbers**

Figure 1: 2

Figure 2: 2

Figure 3: 1.5

Figure 4: 2

Supplemental Figure 1: 1.5

Supplemental Figure 2: 1

Supplemental Figure 3: 2

Supplemental Figure 4: 1.5

Supplemental Figure 5: 1.5

Supplemental Figure 6: 1.5

Supplemental Figure 7: 1.5

Supplemental Figure 8: 2

Supplemental Table 1: 2

Supplemental Table 2: 1

Supplemental Table 3: 1.5

Supplemental Table 4: 1.5
